# Supplementary material for: Rapid production of the anaesthetic mepivacaine through continuous, portable technology
Source: Green Chem. 2024 Jan 23;26(4):2313–21. doi: 10.1039/d3gc04375d (PMC10875724; doi:10.1039/d3gc04375d)
Supplement: GC-026-D3GC04375D-s001 [file GC-026-D3GC04375D-s001.xlsx]

## Sheet: Green metrics
Space time yield (STY)												Process mass intensity					Efactor = PMI -1	Kg waste/Kg product
												PMI = total mass in a process or process step/ mass of product
Reductive amination												Reductive amination
Concentration of SM	1.6	mol/L										Production time	25	min
Volumetric flow rate	1	mL/min										SM in	7.2	g
molar flow rate	0.0016	mol/min										Formic acid in	6.1	g
Production time	25	min										formaldehyde in	3.603	g
MW (Product)	158.22	g/mol										Water SM solution	23.9351	g	6.13506 (from formaldehyde)+ 1.8 (from 2M NaOH)+ rest from top up water
mass of product formed (in 25 mins of production)	6.3288	g										Water Formic acid solution	20	g
mass of product formed (in 25 mins of production) (considering 93% yield)	5.88578	g										Water (NaOH (2 M) solution for extraction)	28	g
Production time	25	min										NaOH in (SM solution + Extraction) in	2.54	g	2.40 (Extraction)+ 0.14 pH adjustment
Reactor volume	10	mL										2-MeTHF (Extraction) in	64.5	g	d (g/mL) 2-MeTHF= 0.86
STY	0.0235431	g·min-1·mL-1										Product obtained (in 25 mins production (considering 93% yield)	5.88578	g
STY	1.41259	Kg·(L·h)^-1										Na2SO4 in	2	g
1 min=	0.0166667	h										considering H2O density = 1 g/mL
Lithiation												PMI	26.8236	Kg total mass/Kg product			E Factor (Excluding water)=	13.5265	Kg waste/Kg product
																	E factor (PMI-1) =	25.8236	Kg waste/Kg product
Concentration of SM	1.6	mol/L										Lithiation
Volumetric Flow Rate	1	mL/min
Molar Flow rate	0.0016	mol/min										Production time	16	min
Production time	16	min										Volumetric flow rate (2,6-dimethylaniline)	1	mL/min
MW (Product)	127.12	g/mol										Volume of (2,6-dimethylaniline(1.6 M) processed	16	mL
mass of product formed (in 16 mins of production)	3.25427	g										2-MeTHF in (From 2,6-dimethylaniline)	11.051	g	d (g/ml) 2-MeTHF =0.86
Production time	16	min										2-MeTHF in (Corrected after recycling) (10% not recycled)	1.1051	g
Reactor volume	0.5	mL										Volumetric flow rate (n-BuLi)	2	mL/min
STY	0.406784	g·min-1·mL-1										Volume of (n-BuLi (1.6M)) processed	32	mL
STY	24.407	Kg·(L·h)^-1										Hexane in (From n-BuLi)	21.088	g	d (g/ml) Hexane =0.659
1 min=	0.0166667	h										Hexane in (Corrected after recycling) (10% not recycled)	2.1088	g
1 min=	60	sec										product obtained in 16 min (Li-amide)	3.25427	g
Amide coupling												n-BuLi in	3.27987	g	n-BuLi (MW)
												2.6-dimethylaniline in	3.10221	g	2,6-dimethylaniline (MW)	64.06	g/mol
Concentration of SM	0.8	mol/L										2.6-dimethylaniline in (recycled)	0.310221	g		121.18	g/mol
Volumetric Flow Rate	1	mL/min
Molar Flow Rate	0.0008	mol/min										PMI	2.09079	Kg total mass/Kg product			E factor (Excluding water) =	no water in this step
Production time	16	min															E factor (PMI-1) =	1.09079	Kg waste/Kg product
MW product	246.35	g/mol										Amide coupling
mass of product formed (in 16 mins of production)	3.15328	g
mass of product formed (in 16 mins of production) considering 47% yield	1.48204	g										Production time	16	min
Production time	16	min										Volumetric flow rate (Li-amide(0.53 M)	3	mL/min	(diluted with n-BuLi stream)
Reactor volume	15	mL										Volume of Li-amide (0.53 M) processed	48	mL
STY	0.00617517	g·min-1·mL-1										Volumetric flow rate (n-BuLi (0.706 M)	3	mL/min	(Diluted with Li-amide stream) =0.706 M (n-BuLi)= (1.6* (2/3)) eq consumed previous)* 2/3 (dilution factor after lithiation step)
STY	0.37051	Kg·(L·h)^-1										Volume of n-Buli (1.06 M) processed	48	mL
1 min=	0.0166667	h										n-BuLi in	2.17087	g
												Volumetric flow rate (N-methylpipecolinate 0.8 M)	1	mL/min
												Volume of N-methylpipecolinate (0.8 M) processed	16	mL
												N-methylpipecolinate in	2.01229	g	MW N-methylpipecolinate
												Product obtained (considering 47% yield)	1.48204	g		157.21	g/mol
												2-MeTHF in	13.76	g	d (g/mL) 2-MeTHF
												2-MeTHF in (corrected after recycling) (10% not recycled)+ previous step	2.4811	g		0.86
												Hexane in	21.088
												Hexane (corrected after recyling) (10% not recyled)	2.1088	g
												Li-amide in	3.23393	g	MW Li-amide= 127.12 g/mol
												Li-amide in (Corrected after recycling) (10% not recycled)	0.323393	g
												Volumetric flow rate (Water) (used for quenching)	1	mL/min
												Water in	16	g	d (g/mL) Water = 1
												Water in (used for crystalls wash)	15	g
												PMI	27.0549	Kg total mass/Kg product			E factor (excluding water)=	4.01012	Kg waste/Kg product
																	E factor (PMI-1) =	26.0549	Kg waste/Kg product
																	Total PMI	55.9693
																	Total E factor	52.9693
																	Total E factor (Excluding water)	18.6274

## Sheet: Green metrics comparison
Suveges et al., 2017
Space time yield (STY)												Process mass intensity						E factor = PMI - 1		Kg waste/Kg product
												PMI = total mass in a process or process step/ mass of product
Amide coupling												Amide coupling
Concentration of SM (2,6-dimehtylaniline)(limiting reagent)	0.08	mol/L	20 mL (Acetonitrile)									Production time	5	min
mass of SM	0.194832	g	d (g/mL) 2,6-dimethylaniline =0.984									2,6-dimethylaniline in	0.194832	g
												picolinic acid in	0.2216	g
Production time	5	min										PCl3 in	0.247118	g	d (g/mL) PCl3= 1.574
MW (Product)	226.28	g/mol										Acetonitrile in	15.72	g	d (g/mL)= 0.786
mass of product formed (in 5 mins of reaction)	0.362048	g										NaOH 1 M in	0.999925	g
mass of product formed (in 5 mins of reaction) (considering 95% yield)	0.343946	g										Ethyl acetate in	5.2866	g	MW EtOAc (g/mol) = 88.11
Production time	5	min										Water (From 1M NaOH) in	24.5306	g	d H2O (g/mL)=1; d NaOH (g/mL)=2.13
Reaction volume	20	mL
STY	0.00343946	g·min-1·mL-1
STY	0.206367	Kg·(L·h)^-1										Product obtained (in 5 mins production (considering 95% yield)	0.343946	g
1 min=	0.0166667	h
												considering H2O density = 1 g/mL
																		E factor (Excluding water)=	64.8592
												PMI	137.233	Kg total mass/Kg product				E Factor =	136.233	Kg waste/Kg product
Hydrogenation-Reductive amination
Concentration of SM	0.01	mol/L
Volumetric Flow Rate	0.5	mL/min
Molar Flow Rate	5e-06	mol/min
Production time	160	min
MW product	246.35	g/mol
mass of product formed (in 160 mins of production)	0.19708	g										Hydrogenation-reductive amination
mass of product formed (in 160 mins of production) considering 83% yield	0.163576	g
Production time	160	min										Production time	160	min
Reactor volume	0.8	mL										Volumetric flow rate (2',6'-picolinoxylidide 0.01 M)	0.5	mL/min
STY	0.00127794	g·min-1·mL-1										Volume of 2',6'-picolinoxylidide (0.01 M) processed	80	mL
STY	0.0766764	Kg·(L·h)^-1										2',6'-picolinoxylidide (0.01 M) in	0.181024	g	MW (g/mol)= 226.28		1 eq. =	0.0008
1 min=	0.0166667	h										Formaldehyde in (4 eq.)	0.0960832	g	MW formaldehyde (g/mol)= 30.026
												AcOH in (100 eq.)	4.80416	g	MW AcOH (g/mol)= 60.052
												MeOH in	75.1823	mL	80-(0.238 mL Formaldehyde)-(4.57 mL AcOH)
												MeOH in	59.4692	g	d (g/mL) MeOH = 0.791
												NaOH 1 M in (workup)	0.999925	g	MW N-methylpipecolinate	157.21	g/mol
												Water in (workup) from 1 M NaOH	24.5306	g	assumed to be the same as in previous step
												Water in from formaldehyde solution	0.150066	g	37% (w,v) solution; d (g/mL) H2O = 1
												EtOAC in (workup)	5.2866	g	assumed to be the same as in previous step
												Product obtained in 160 min (considering 83% yield)	0.163576	g
																		E factor (Excluding Water) =	431.847
												PMI	583.933	Kg total mass/Kg product				E factor=	582.933	Kg waste/Kg product
												Total PMI	721.166					Total E factor (Excluding water)=	496.706
																		Total Efactor =	719.166
Ekenstam et al., 1957
Hydrogenation												Hydrogenation
picolinic acid	70	g										Production time	90	min
												picolinic acid in	70	g
												EtOH in	300	g
Production time	90	min										Acetic acid in	70	g
												HCl in	22.2	g
mass of product formed (in 90 mins of reaction)	93.75	g										Water in (60 g of HCl 37%)	37.8	g
mass of product formed (in 90 mins of reaction) (considering 95% yield after evaporation)	89.0625	g
Production time	90	min
Reaction volume (EtOH + Acetic acid)	446.477	mL	d (g/mL) EtOH= 0.79 ; d (g/mL) acetic acid= 1.049
STY	0.00221643	g·min-1·mL-1
STY	0.132986	Kg·(L·h)^-1
1 min=	0.0166667	h
												Product obtained in 90 min (considering 95% yield)	89.0625	g
Amide coupling
Mass of SM (dl-pipecolic acid hydrochloride)	100	g
																		E factor (excluding water)=	4.13698
												PMI	5.61404	Kg total mass/Kg product				E factor=	4.61404	Kg waste/Kg product
Production time (8 h + 6 h + 0.5 h)	870	min
												Amide coupling
mass of product formed (in 870 mins of reaction) (considering 80% yield)	112	g										Production time	870	min
Production time	180	min										dl-pipecolic acid hydrochloride in	100	g
Reaction volume (Acetylchloride )	1000	mL										Acetylchloride (1000 mL) in	1100	g	d (g/mL) acetyl chloride= 1.1
STY	0.000622222	g·min-1·mL-1										phosphorous pentachloride (1st + 2nd addition) in	150	g
STY	0.0373333	Kg·(L·h)^-1										Toluene in (wash)		g	unknown
1 min=	0.0166667	h										Acetone in (wash)		g	unknown
												Acetone in (600 mL)	474.6	g	d (g/mL) acetone= 0.791
												2,6-xylidine in	180	g
Alkylation												NaOH (precipitation)		g	unknown
												Activated carbon		g	unknown
Mass of SM (dl-pipecolic acid 2,6-xylidide)	100	g										EtOH (recrystallization)		g	unknown
Production time (6 h)	360	min										Product obtained in 870 min (considering 80% yield)	112	g
mass of product formed (in 360 mins of reaction)	105.92	g
mass of product formed (in 360 mins of reaction) (considering 76% yield)	80.5	g
Production time	360	min
Reaction volume (methyl alcohol )	200	mL																E factor (excluding water)=	unknown
STY	0.00111806	g·min-1·mL-1										PMI	19.275	Kg total mass/Kg product				E factor=	18.275	Kg waste/Kg product
STY	0.0670833	Kg·(L·h)^-1
1 min=	0.0166667	h
												Alkylation
												Production time	360	min
												dl-pipecolic acid 2,6-xylidide	100	g
												Methyl alcohol (200 mL)	158.2	g	d (g/mL) MeOH= 0.791
												potassium carbonate	45	g
												dimethylsulfate	55	g
												HCl (37% ) in (37 mL)	16.2911	g	d (g/mL) HCl 37% =1.19
												H2O from 37% HCl	27.7389	g
												Water in	750	g	d (g/mL) H2O= 1
												NaOH (precipitation)		g	unknown
												Recystallization solvents		g	unknown
												Carbon treatment		g	unknown
												Product obtained in 360 min (considering 76% yield)	80.5	g
																		E factor (excluding water)=	3.33629
												PMI	14.3134	Kg total mass/Kg product				E factor=	13.3134	Kg waste/Kg product
												Total PMI=	39.2025					Total E factor (excluding water)=	7.47327
																		Total E factor=	36.2025

## Sheet: Atom economy 
Atom economy =( MW of product /Total MW of SM's)·100
Reductive amination step
pipecolinate (Hydrochloride)	179.64	g/mol
formaldehyde	30.03	g/mol		255.7
Formic acid	46.03	g/mol
Product (acetate salt)	217.13	g/mol
AE (%)	84.9159	%
Lithiation step						Global atom economy =	33.9667	%
2,6-dimethylaniline	121.18	g/mol
n-BuLi	64.06	g/mol		185.24		Global atom economy =	0.510255
Product	127.12	g/mol
AE (%)	68.6245	%
Amide coupling step
N-methylpipecolinate (neutral form after extraction)	157.21	g/mol
Li-amide	127.12	g/mol		284.33
Product	246.35	g/mol
AE (%)	86.6423	%
